# Supplementary material for: Canine Gallbladder Erosion/Ulcer and Hemocholecyst: Clinicopathological Characteristics of 14 Cases
Source: MDPI journal article supplement (doi:10.3390/ani13213335), 2023-10-26
Supplement: s1 [file s1]

Supplemental Table S1

**Signalment and results of clinicopathological investigation of 24 dogs.**

| Case number            | Age <sup>d</sup> | Breed                | Sex             | Duration between clinical onset and cholecystectomy | Gallbladder rupture? | Chief complaint                                           | Ultrasonographic findings of gallbladder    | CBC <sup>j</sup>                                   | Blood chemistry <sup>k</sup>                                                                                                                                                         |
|------------------------|------------------|----------------------|-----------------|-----------------------------------------------------|----------------------|-----------------------------------------------------------|---------------------------------------------|----------------------------------------------------|--------------------------------------------------------------------------------------------------------------------------------------------------------------------------------------|
| <b>GU<sup>a</sup>1</b> | 103              | Toy Poodle           | M <sup>e</sup>  | > 3 wks                                             | Yes                  | Vomiting, lethargy                                        | Mucocele                                    | Leukocytosis with band neutrophils                 | TP <sup>l</sup> 4.0, Alb <sup>m</sup> 1.3, CRP <sup>n</sup> >7.0, TBA <sup>o</sup> 19.7 (pre)→33.2 (post), branched chain amino acids 187, thyroxine 16 2wk later TP 5.4 and Alb 1.8 |
| <b>GU2</b>             | 162              | Shetland Sheepdog    | CM <sup>f</sup> | 3 days                                              | No                   | Anorexia, lethargy, vomiting, icterus                     | Distention, thickened wall                  | None                                               | Elevated liver enzymes, T-Bil 6.3, ALP <sup>p</sup> >3500                                                                                                                            |
| <b>GU3</b>             | 170              | Miniature Dachshund  | CM              | 2 days                                              | Yes                  | Lethargy                                                  | Gallbladder rupture                         | NA                                                 | Elevated liver enzymes                                                                                                                                                               |
| <b>GU4</b>             | 86               | Mixed breed          | SF <sup>g</sup> | 2 wks                                               | No                   | Anorexia, bilirubinuria, icterus                          | Material with shadowing                     | NA                                                 | ALP >2000, ALT <sup>q</sup> 869, AST <sup>r</sup> 163, GGT <sup>s</sup> 126, T-Bil <sup>t</sup> 5.2                                                                                  |
| <b>GU5</b>             | 157              | Miniature Dachshund  | SF              | Same day                                            | No                   | Anorexia, vomiting, diarrhea                              | Sludge, thickened wall                      | Anemia                                             | Glu <sup>u</sup> 74, Alb 2.2, ALT 78, AST 421, ALP 650, CRP over                                                                                                                     |
| <b>GU6</b>             | 132              | German Shepherd Dog  | M               | Same day                                            | Yes                  | Vomiting, lethargy, ascites (yellowish sanguineous fluid) | NA                                          | NA                                                 | NA                                                                                                                                                                                   |
| <b>GU7</b>             | 69               | Mixed breed          | CM              | > 1 month                                           | Yes                  | NA                                                        | NA                                          | NA                                                 | NA                                                                                                                                                                                   |
| <b>GU8</b>             | 102              | Yorkshire Terrier    | F <sup>h</sup>  | 9 days                                              | NA                   | Anorexia, lethargy, vomiting, icterus                     | Immovable contents                          | NA                                                 | ALT >1000, ALP >3500, Lip <sup>v</sup> >1000, T-Bil 1.0, elevation of T-Cho <sup>w</sup> , GGT, CRP                                                                                  |
| <b>GU9</b>             | 120              | Mixed breed          | CM              | Same day                                            | NA                   | Collapse, hemoabdomen                                     | NA                                          | Mild anemia                                        | Elevated ALT and ALP                                                                                                                                                                 |
| <b>GU10</b>            | 166              | Shiba Inu            | CM              | 17 days                                             | No                   | Anorexia, vomiting                                        | Sludge, thickened wall                      | None                                               | Elevation of T-Bil, liver enzymes, CRP                                                                                                                                               |
| <b>GU11</b>            | 112              | Miniature Dachshund  | SF              | Same day                                            | No                   | Vomiting                                                  | NA                                          | NA                                                 | Marked elevation of liver enzymes and T-Bil                                                                                                                                          |
| <b>GU12</b>            | 127              | Pembroke Welsh Corgi | SF              | 6 days                                              | No                   | Anorexia, lethargy, vomiting                              | Mucocele, dilation of                       | NA                                                 | Marked elevation of T-Bil                                                                                                                                                            |
| <b>GU13</b>            | 104              | Chihuahua            | SF              | Same day                                            | Yes                  | Lethargy                                                  | Gallstone                                   | Neutrophilia with left shift and toxic neutrophils | ALT 133, AST 55, ALP 3212, T-Cho 347, GGT 18                                                                                                                                         |
| <b>GU14</b>            | 107              | Mixed breed          | CM              | 1 day                                               | NA                   | Febrile                                                   | NA                                          | None                                               | ALT 248, AST 128, ALP 3083, T-Bil 0.7, T-Cho 438, GGT 16                                                                                                                             |
| <b>CC<sup>b</sup>1</b> | 149              | Miniature Dachshund  | SF              | No clinical sign                                    | No                   | None                                                      | Fluid                                       | None                                               | No abnormality                                                                                                                                                                       |
| <b>CC2</b>             | 30               | French Bulldog       | M               | No clinical sign                                    | No                   | Intermittent vomiting after meal, rare hematemesis        | Sludge                                      | NA                                                 | Elevated liver enzymes                                                                                                                                                               |
| <b>CC3</b>             | 161              | Chihuahua            | CM              | NA <sup>i</sup>                                     | No                   | NA                                                        | NA                                          | NA                                                 | NA                                                                                                                                                                                   |
| <b>CC4</b>             | 146              | Maltese              | SF              | No clinical sign                                    | No                   | None                                                      | Sludge, gallstone                           | NA                                                 | NA                                                                                                                                                                                   |
| <b>CC5</b>             | 174              | Miniature Dachshund  | CM              | 3 days                                              | No                   | Anorexia, icterus                                         | Cholecystitis                               | Anemia                                             | NA                                                                                                                                                                                   |
| <b>GM<sup>c</sup>1</b> | 146              | Border Collie        | CM              | No clinical sign                                    | No                   | NA                                                        | Mucocele                                    | NA                                                 | Elevated ALT and ALP                                                                                                                                                                 |
| <b>GM2</b>             | 136              | Shiba Inu            | M               | 1 day                                               | No                   | Anorexia, lethargy                                        | Mucocele                                    | Leukocytosis                                       | Elevation of liver enzymes and T-Bil                                                                                                                                                 |
| <b>GM3</b>             | 150              | Chihuahua            | CM              | 1 day                                               | No                   | Anorexia                                                  | Mucocele                                    | NA                                                 | NA                                                                                                                                                                                   |
| <b>GM4</b>             | 126              | Pomeranian           | M               | > 2 months                                          | No                   | NA                                                        | Mucocele, marked distention, thickened wall | NA                                                 | NA                                                                                                                                                                                   |
| <b>GM5</b>             | 144              | Miniature Schnauzer  | CM              | No clinical sign                                    | No                   | NA                                                        | Mucocele                                    | NA                                                 | Elevated liver enzymes                                                                                                                                                               |

<sup>a</sup>gallbladder ulcer, <sup>b</sup>chronic cholecystitis, <sup>c</sup>gallbladder mucocele, <sup>d</sup>in months, <sup>e</sup>male, <sup>f</sup>castrated male, <sup>g</sup>spayed female, <sup>h</sup>female, <sup>i</sup>not available, <sup>j</sup>complete blood count, <sup>j</sup> and <sup>k</sup>no reference interval provided, <sup>l</sup>total protein, <sup>m</sup>albumin, <sup>n</sup>cholesterol, <sup>x</sup>present, <sup>y</sup>gallbladder wall total thickness in micrometer

Supplemental Table S1

| Other findings provided by the submitters                                                                           | Ultrasonographic sludge | Histologic mucocele | Histologic gallbladder contents                 | Histologic erosion and/or ulcer | Severe cholecystitis | Mild cholecystitis | No cholecystitis          | GWTT <sup>y</sup> |
|---------------------------------------------------------------------------------------------------------------------|-------------------------|---------------------|-------------------------------------------------|---------------------------------|----------------------|--------------------|---------------------------|-------------------|
| Small intestinal lymphatic dilation upon laparotomy, gallbladder adhesion                                           |                         | P                   | Mucocele, blood, fibrin, bile                   | P                               |                      |                    | P                         | 1760              |
| Common bile duct occlusion                                                                                          |                         |                     | Mucus, bile, blood                              | P                               | P                    |                    |                           | 1450              |
| Ascites, recent rabies vaccination                                                                                  |                         | P                   | Mucus, blood                                    | P                               | P                    |                    |                           | 3800              |
| Opaque material on X-ray, <b>cholelith</b> in gallbladder and bile duct on CT, dilation and tortuosity of bile duct |                         |                     | Mucus, blood                                    | P                               | P                    |                    |                           | 1650              |
| Splenic nodular masses (ultrasound, laparotomy: histologic diagnosis extramedullary hematopoiesis)                  | P <sup>x</sup>          |                     | Mucus, bile, fibrin, blood, suppurative exudate | P                               | P                    |                    |                           | 1430              |
| Ascites with cocci-laden neutrophils                                                                                |                         |                     | Mucus, bile, blood                              | P                               | P                    |                    |                           | 2130              |
| Gallbladder adhesion                                                                                                |                         | P                   | Blood                                           | P                               |                      |                    | P<br>(autolysis/necrosis) | 1640              |
| None                                                                                                                |                         |                     | Blood, suppurative exudate                      | P                               |                      | P                  |                           | 1300              |
| Hepatic nodular mass (histologic diagnosis hepatocellular adenoma)                                                  |                         |                     | Blood                                           | P                               |                      | P                  |                           | 840               |
| Common bile duct partial occlusion                                                                                  | P                       |                     | Mucus, blood                                    | P                               | P                    |                    |                           | 1360              |
| Microhepatia                                                                                                        |                         |                     | Mucus, blood                                    | P                               | P                    |                    |                           | 1180              |
| Dilation of bile duct                                                                                               |                         |                     | Mucus, blood                                    | P                               | P                    |                    |                           | 1700              |
| Gallbladder suppurative exudate                                                                                     |                         |                     | Mucus, blood, suppurative exudate               | P                               | P                    |                    |                           | 1260              |
| Peritonitis                                                                                                         |                         |                     | Bile                                            | P                               | P                    |                    |                           | 2090              |
| Fragile liver                                                                                                       |                         |                     | None                                            |                                 | P                    |                    |                           | 912               |
| Scant ascites upon laparotomy, pyloric stenosis palpated                                                            | P                       |                     | None                                            |                                 | P                    |                    |                           | 1780              |
| NA                                                                                                                  |                         |                     | None                                            |                                 | P                    |                    |                           | 1540              |
| Bile duct dilation                                                                                                  | P                       |                     | None                                            |                                 | P                    |                    |                           | 1360              |
| NA                                                                                                                  |                         |                     | None                                            |                                 | P                    |                    |                           | 1560              |
| Small intestinal lymphangiectasis                                                                                   |                         | P                   | Mucocele                                        |                                 |                      | P                  |                           | 1510              |
| NA                                                                                                                  |                         | P                   | Mucocele                                        |                                 |                      |                    |                           | 1470              |
| NA                                                                                                                  | P                       | P                   | Mucocele                                        |                                 |                      | P                  |                           | 1700              |
| NA                                                                                                                  |                         | P                   | Mucocele                                        |                                 |                      | P                  |                           | 2710              |
| Diabetes mellitus (being treated with insulin), obese, hepatomegaly                                                 |                         | P                   | Mucocele                                        |                                 |                      | P                  |                           | 481               |

nin, <sup>n</sup>C-reactive protein, <sup>o</sup>total bile acids, <sup>p</sup>alkaline phosphatase, <sup>q</sup>alanine aminotransferase, <sup>r</sup>aspartate aminotransferase, <sup>s</sup>γ-glutamyl transpeptidase, <sup>t</sup>total bilirubin, <sup>u</sup>glucose, <sup>v</sup>lipase, <sup>w</sup>total
