# Supplementary material for: Canine Gallbladder Erosion/Ulcer and Hemocholecyst: Clinicopathological Characteristics of 14 Cases
Source: MDPI journal article supplement (doi:10.3390/ani13213335), 2023-10-26
Supplement: s1 [file s1]

## Supplemental Figure S2

Gross findings of the affected gallbladders.  
Blood coagula (arrowheads) are attached to the gallbladder mucosa.

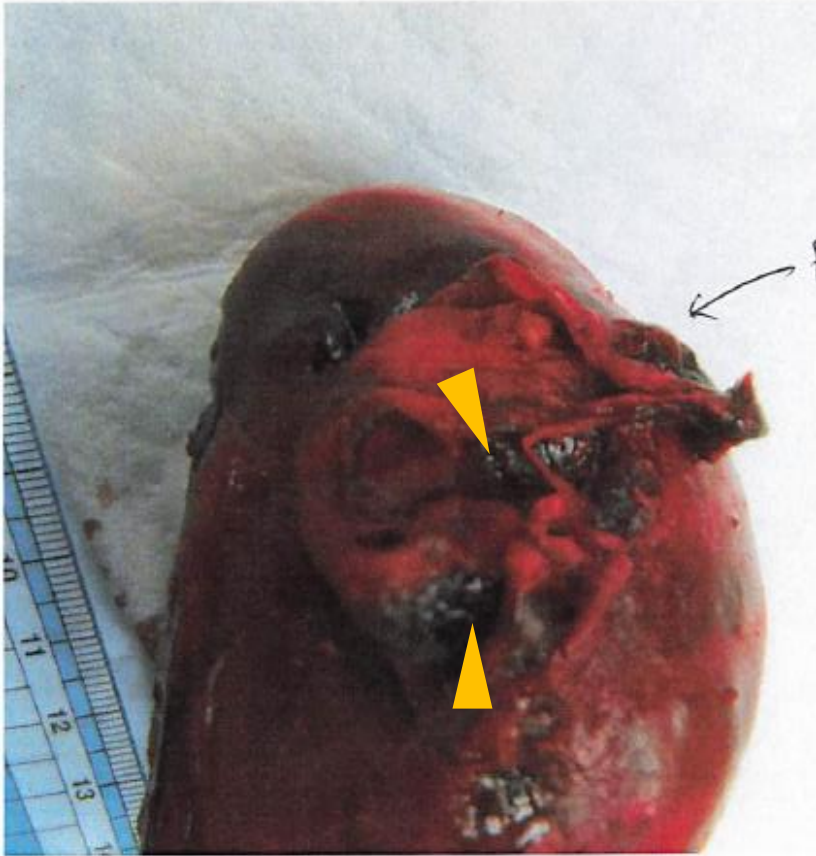

GU9 (formalin unfixed)

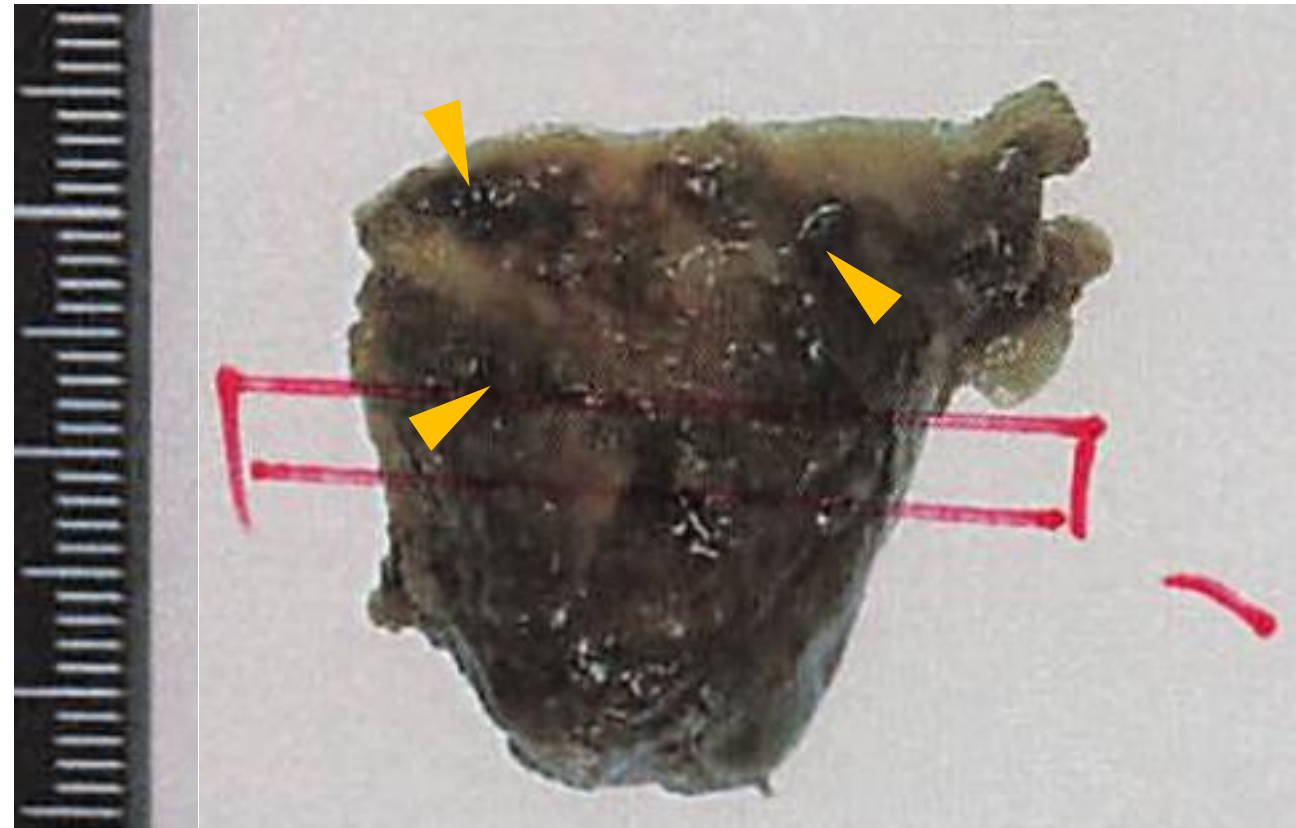

GU14 (formalin fixed)
